# Supplementary material
Source: PubMed Central journal article supplement (PMC8956360)
Supplement: NIHMS1734679-supplement-1734679_Tab_s1.pdf [file NIHMS1734679-supplement-1734679_Tab_s1.pdf]

**Table S1. Sequencing methods and analysis summaries**

| Individual(s) sequenced | Center    | Method          | Data analysis and filtering strategy            |
|-------------------------|-----------|-----------------|-------------------------------------------------|
| Family 1 IV:4           | Würzburg  | ES              | Vona <i>et al</i> 2021 <sup>1</sup>             |
| Family 2 IV:3           | San Diego | ES              | Ghosh <i>et al</i> 2021 <sup>2</sup>            |
| Family 3 II:1, II:2     | Würzburg  | ES              | Vona <i>et al</i> 2021 <sup>1</sup>             |
| Family 4 V:3            | San Diego | ES              | Ghosh <i>et al</i> 2021 <sup>2</sup>            |
| Family 5 II:1           | UCL       | ES              | Lin <i>et al</i> , 2021 <sup>3</sup>            |
| Family 6 IV:1           | Tübingen  | ES              | Vona <i>et al</i> 2021 <sup>1</sup>             |
| Family 7 IV:1           | San Diego | ES              | Ghosh <i>et al</i> 2021 <sup>2</sup>            |
| Family 8 IV:1           | San Diego | ES              | Ghosh <i>et al</i> 2021 <sup>2</sup>            |
| Family 9 II:1           | GeneDx    | ES              | Guillen Sacoto <i>et al</i> , 2020 <sup>4</sup> |
| Family 10 II:4          | GeneDx    | ES              | Guillen Sacoto <i>et al</i> , 2020 <sup>4</sup> |
| Family 11 V:1           | Riyadh    | HL panel        | Lin <i>et al</i> , 2021 <sup>3</sup>            |
| Family 12 II:1          | Riyadh    | ES              | Lin <i>et al</i> , 2021 <sup>3</sup>            |
| Family 13 II:1          | GeneDx    | HL Panel        | N/A                                             |
| Family 14 II:2          | GeneDx    | ES              | Guillen Sacoto <i>et al</i> , 2020 <sup>4</sup> |
| Family 15 I:2, II:1     | UCL       | GS              | Lin <i>et al</i> , 2021 <sup>3</sup>            |
| Family 16 II:1          | GeneDx    | Autism ID panel | Guillen Sacoto <i>et al</i> , 2020 <sup>4</sup> |

ES, exome sequencing; HL, hearing loss; ID, intellectual disability
